# Supplementary material for: The preclinical efficacy of the novel hypomethylating agent NTX-301 as a monotherapy and in combination with venetoclax in acute myeloid leukemia
Source: PubMed Central journal article supplement (PMC9001641; doi:10.1038/s41408-022-00664-y), 2022-04-11

1 **Supplementary Figure Legends**

2

3

4 **The preclinical efficacy of the novel hypomethylating agent NTX-**  
5 **301 as a monotherapy and in combination with venetoclax in acute**  
6 **myeloid leukemia**

7 **Running title: NTX-301 in acute myeloid leukemia**

8 Byungho Lim<sup>1,\*</sup>, Dabin Yoo<sup>1</sup>, Younghwa Chun<sup>2</sup>, Areum Go<sup>2</sup>, Kyung-Jin Cho<sup>1</sup>, Daeun  
9 Choi<sup>1</sup>, Myoung Eun Jung<sup>1</sup>, Ha Young Lee<sup>2</sup>, Rebecca J. Boohaker<sup>3</sup>, Jin Soo Lee<sup>2</sup>,  
10 DooYoung Jung<sup>2</sup>, and Gildon Choi<sup>1,\*</sup>

11 <sup>1</sup>Research Center for Drug Discovery Technology, Korea Research Institute of  
12 Chemical Technology, Daejeon, Republic of Korea

13 <sup>2</sup>Pinotbio, Inc, Suwon, Republic of Korea

14 <sup>3</sup>Southern Research, Division of Drug Discovery, Birmingham, AL, United States

15

16

17

18

19

20

21

22 **Supplementary Figure S1. Summary of treatment schedules for assessing the**  
23 **efficacy and survival benefits of NTX-301 in four preclinical models of AML. A**

24 Schematic outline of the 3-cycle NTX-301 treatment schedule for monitoring survival  
25 and hematologic profiles in the systemic MV4-11 model. **B-E** Tables summarizing the  
26 treatment schedules for monitoring survival and hematologic profiles in the systemic  
27 MV4-11 model (**B**), for comparing the antitumor efficacy of NTX-301 with that of AZA  
28 in the systemic model bearing luciferase-labeled MV4-11 tumors (**C**), for comparing  
29 the antitumor efficacy of NTX-301 administered by different methods in the systemic  
30 model bearing luciferase-labeled MV4-11 tumors (**D**) and for evaluating the antitumor  
31 efficacy of NTX-301 in a dose-dependent manner in the subcutaneous model  
32 bearing MOLM-13 tumors (**E**). CP, cyclophosphamide; AZA, azacitidine; DAC,  
33 decitabine; NTX, NTX-301; p.o., oral administration; i.p., intraperitoneal  
34 administration; q.d., once a day.

35  
36 **Supplementary Figure S2. In vivo assessment of tolerability upon treatment with**  
37 **NTX-301, DAC, or AZA. A-B** Line plots showing changes in hematologic profiles (**A**)  
38 and body weights (**B**) of female NOD/SCID mice bearing MV4-11 tumors (n=8 per  
39 group) upon treatment with NTX-301 [(1.5, 2.0, or 2.5 mg/kg (p.o.)), DAC (2.5 mg/kg  
40 (i.p.)), or AZA [5.0 mg/kg (i.p.)]. AZA, azacitidine; DAC, decitabine; NTX, NTX-301;  
41 SEM, standard error of the mean; p.o., oral administration; i.p., intraperitoneal  
42 administration.

43  
44 **Supplementary Figure S3. Flow cytometric analyses for the detection of**

45 **residual human CD45<sup>+</sup> MV4-11 cells in cells isolated from bone marrow.** The  
46 inner boxes indicate human CD45<sup>+</sup> MV4-11 cells, and the percentages of these cells  
47 are shown on the right.

48

49 **Supplementary Figure S4. Comparison of the in vivo efficacies of NTX-301 and**  
50 **AZA.** In NOD/SCID mouse models transplanted with luciferase-labeled MV4-11 cells  
51 (n=8 per group), tumor growth was measured by the quantification of bioluminescence  
52 emission (photons/sec) upon treatment with NTX-301 (2.0 mg/kg p.o.) or AZA (5.0  
53 mg/kg i.p.). This Supplementary Figure presents single individual values from Fig. 1C  
54 to avoid misleading by large standard deviations. *P*-values (vs. vehicle) are specified  
55 and marked as follows: \*, *p*<0.05; \*\*, *p*<0.001; NS, not significant. AZA, azacitidine;  
56 p.o., oral administration; i.p., intraperitoneal administration.

57

58 **Supplementary Figure S5. Transcriptome-wide alterations induced by NTX-301**  
59 **revealed MoAs of NTX-301.** **A** GSEA plots displaying significant enrichment of a  
60 normal myeloid-like signature (left) and a leukemic stem cell signature (right) among  
61 transcriptome changes induced by NTX-301 or DAC for 48 hours in MV4-11 and HL-  
62 60 cells. **B** Heatmaps showing genesets upregulated more strongly by NTX-301 than  
63 by DAC and bar plots showing the biological pathways associated with each gene  
64 set in MV4-11, MOLM-13, and HL-60 cells. DAC, decitabine; GSEA, gene set  
65 enrichment analysis; MoA, mechanism of action; NTX, NTX-301.

66

67 **Supplementary Figure S6. Transcriptome analyses implied that NTX-301**  
68 **activates a p53 transcriptional program. A** Heatmap showing the expression levels  
69 of p53 target genes (n=116) induced by NTX-301 or DAC for 48 hours in MV4-11 cells.  
70 Genes with marked transcriptional changes are listed. **B** Ingenuity pathway analysis  
71 (IPA) highlighting the activation of p53 as an upstream regulator of genes upregulated  
72 by DAC or NTX-301. Z-scores and *p*-values are shown. **C** GSEA plots showing  
73 significant enrichment of a p53 signature among transcriptome changes induced by  
74 NTX-301 or DAC for 48 hours in p53-proficient AML cells, MV4-11 and MOLM-13.  
75 DAC, decitabine; GSEA, gene set enrichment analysis; NTX, NTX-301.

76

77 **Supplementary Figure S7. NTX-301 elicited the induction of the DDR and the p53**  
78 **pathway. A** Western blots showing the expression levels of proteins involved in the  
79 DDR-p53 pathway in MV4-11 cells treated with NTX-301 or DAC (60, 200, and 500  
80 nM) for 24 hours (up). Western blot showing the protein levels of DNMT1 in MV4-11,  
81 MOLM-13, and HL-60 cells treated with NTX-301 or DAC (60, 200, and 500 nM) for  
82 24 hours (bottom). **B** Bar plots showing the mRNA expression levels ( $\log_2$ ) of *TP53*,  
83 *MDM2*, and *CDKN1A* upon treatment with NTX-301 or DAC (60 nM) for 48 and 96  
84 hours in the MV4-11 cell line. **C** Western blots showing the expression levels of p53 in  
85 parental (Con) and *TP53*-knockdown (shTP53) MV4-11 cells. DAC, decitabine; DDR,  
86 DNA damage response; NTX, NTX-301.

87

88 **Supplementary Figure S8. Summary of the treatment schedules for assessing**  
89 **the efficacy of NTX-301 as a monotherapy and in combination with VCX using**

90 **two preclinical models of AML. A-B** Tables summarizing the treatment schedules  
91 for comparing the combinatorial efficacies of NTX-301+VCX and AZA+VCX in the  
92 subcutaneous MV4-11 model (**A**) and for comparing the survival benefits of NTX-  
93 301+VCX and AZA+VCX in the systemic MV4-11 model (**B**). AZA, azacitidine; NTX,  
94 NTX-301; VCX, venetoclax; p.o., oral administration; i.p., intraperitoneal  
95 administration; q.d., once a day; biw, twice weekly.

96

97

98 **Supplementary Figure S9. Assessment of mouse body weights upon treatment**  
99 **with NTX-301 or AZA as a monotherapy and in combination with VCX using**  
100 **two preclinical models of AML. A-B** Line plots showing changes in the body  
101 weights of the mice described in Supplementary Fig. S8A (**A**) and Supplementary  
102 Fig. S8B (**B**). AZA, azacitidine; NTX, NTX-301; VCX, venetoclax.

103

# Supplementary Figure S1

**A**

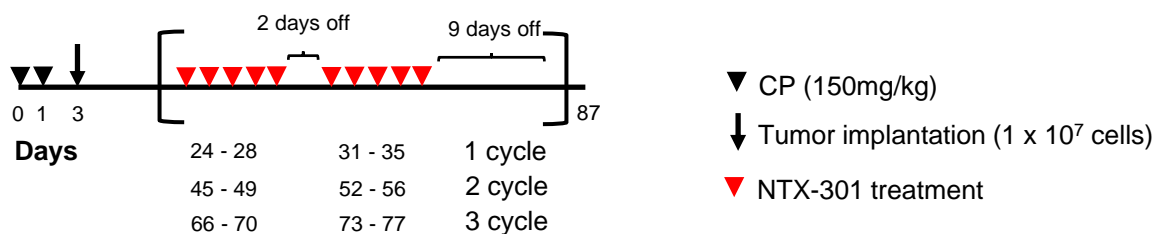

**B**

| Group | Mice | Agent   | mg/kg | Route | Schedule                                                   |
|-------|------|---------|-------|-------|------------------------------------------------------------|
| 1     | n=8  | Vehicle | ---   | po    | qd x 5 then 2 days off, 5 days on, 9 days off for 3 cycles |
| 2     | n=8  | NTX-301 | 1.5   | po    | qd x 5 then 2 days off, 5 days on, 9 days off for 3 cycles |
| 3     | n=8  | NTX-301 | 2.0   | po    | qd x 5 then 2 days off, 5 days on, 9 days off for 3 cycles |
| 4     | n=8  | NTX-301 | 2.5   | po    | qd x 5 then 2 days off, 5 days on, 9 days off for 3 cycles |
| 5     | n=8  | DAC     | 2.5   | ip    | Three times a week for two weeks                           |
| 6     | n=8  | AZA     | 5.0   | ip    | Twice a week for three weeks                               |

**C**

| Group | Mice | Agent   | mg/kg | Route | Schedule                                        |
|-------|------|---------|-------|-------|-------------------------------------------------|
| 1     | n=8  | Vehicle | ---   | po    | Daily on Days 21-25 and 28-32                   |
| 2     | n=8  | NTX-301 | 2.0   | po    | Daily on Days 21-25 and 28-32                   |
| 3     | n=8  | AZA     | 5.0   | ip    | Twice a week on days 21, 25, 28, 32, 35, and 39 |

**D**

| Group | Mice | Agent   | Single dose (mg/kg) | Daily dose (mg/kg) | Route | Schedule                                                                              |
|-------|------|---------|---------------------|--------------------|-------|---------------------------------------------------------------------------------------|
| 1     | n=6  | Vehicle | ---                 | ---                | po    | Daily on Days 18-22, 25-29, and 39-43<br>Daily on Days 18-22, 25-29, 39-43, and 46-48 |
| 2     | n=6  | NTX-301 | 2.0                 | 2.0                | po    | 2X daily on Days 18-22, 25-29, 39-43, and 46-47 and once on Day 48                    |
| 3     | n=6  | NTX-301 | 1.0                 | 2.0                | po    | Daily on Days 18-22, 25-29, 32-36, 39-43, and 46-48                                   |
| 4     | n=6  | NTX-301 | 1.0                 | 1.0                | po    | Daily on Days 18-22, 25-29, 32-36, 39-43, and 46-48                                   |

**E**

| Group | Mice | Agent   | mg/kg | Route | Schedule                        |
|-------|------|---------|-------|-------|---------------------------------|
| 1     | n=6  | Vehicle | ---   | ip    | 1x daily on days 8-12 and 15-19 |
| 2     | n=6  | NTX-301 | 0.2   | ip    | 1x daily on days 8-12 and 15-19 |
| 3     | n=6  | NTX-301 | 0.4   | ip    | 1x daily on days 8-12 and 15-19 |
| 4     | n=6  | NTX-301 | 0.8   | ip    | 1x daily on days 8-12 and 15-19 |
| 5     | n=6  | NTX-301 | 1.5   | ip    | 1x daily on days 8-12 and 15-19 |

# Supplementary Figure S2

**A**

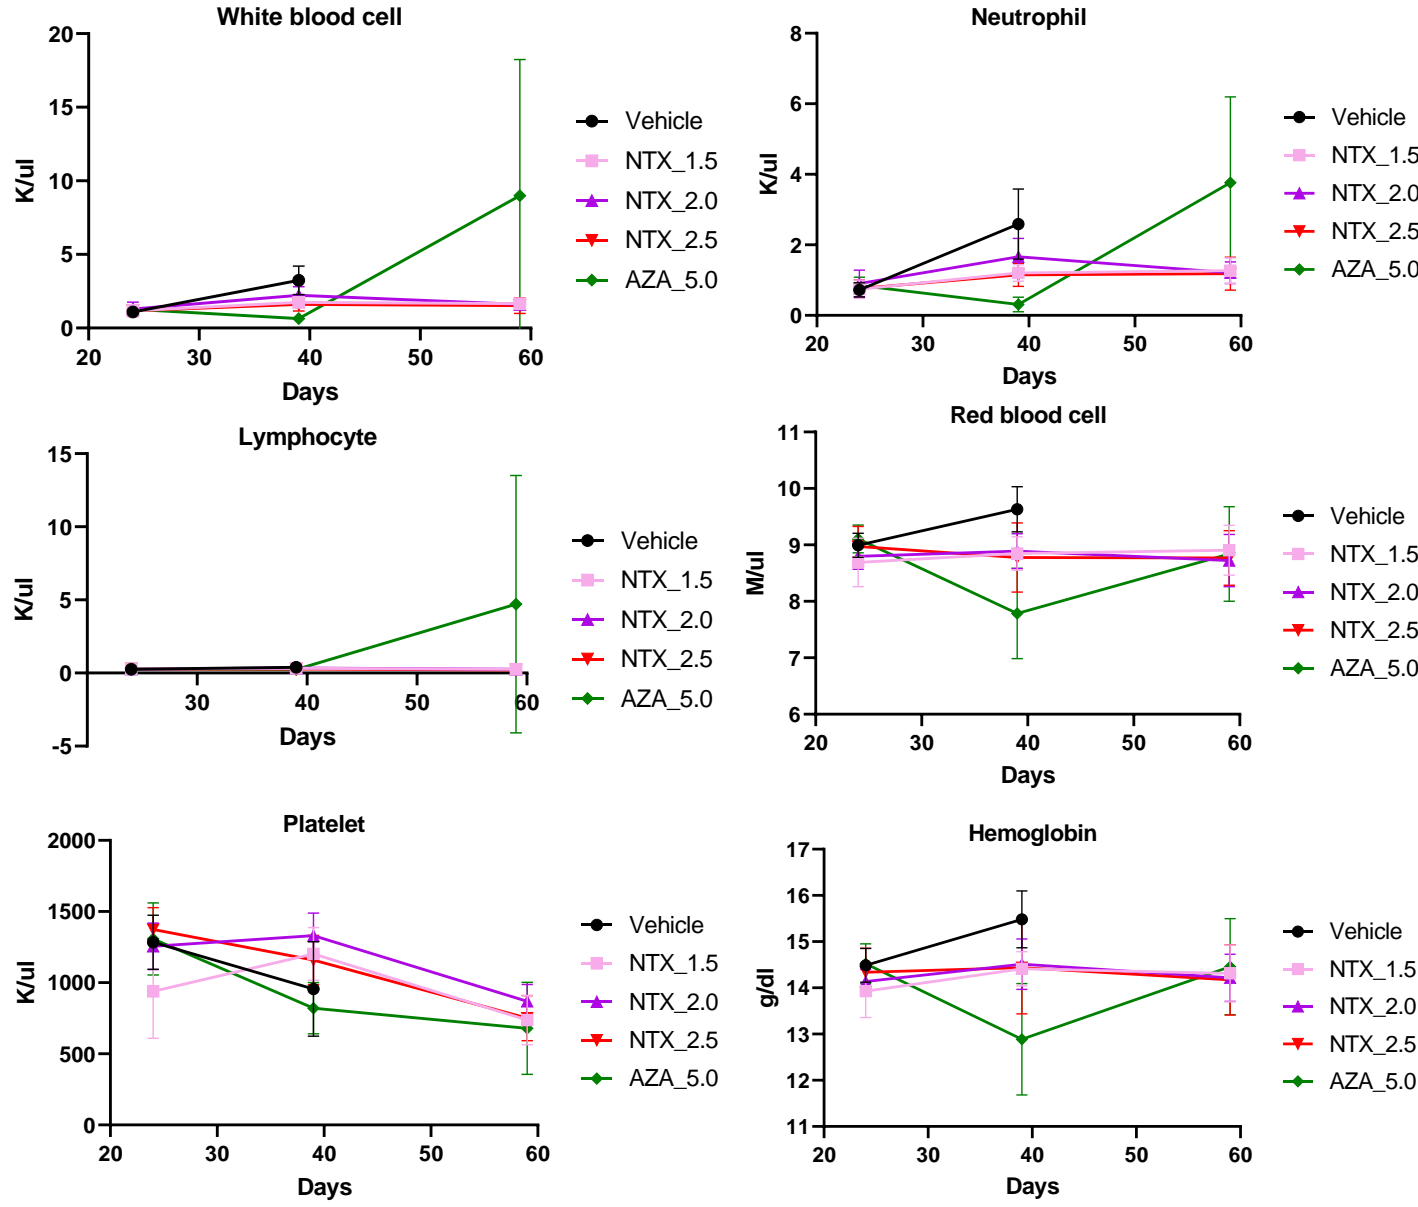

**B**

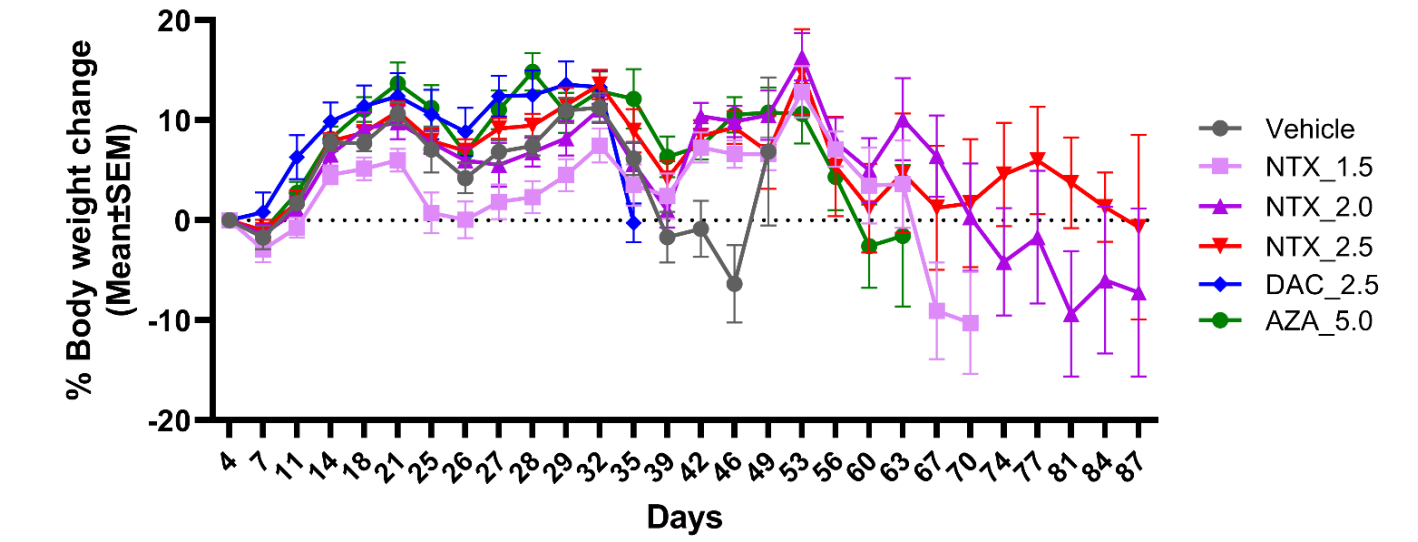

# Supplementary Figure S3

## % Human CD45+ MV4-11 cells determined by FACS analysis

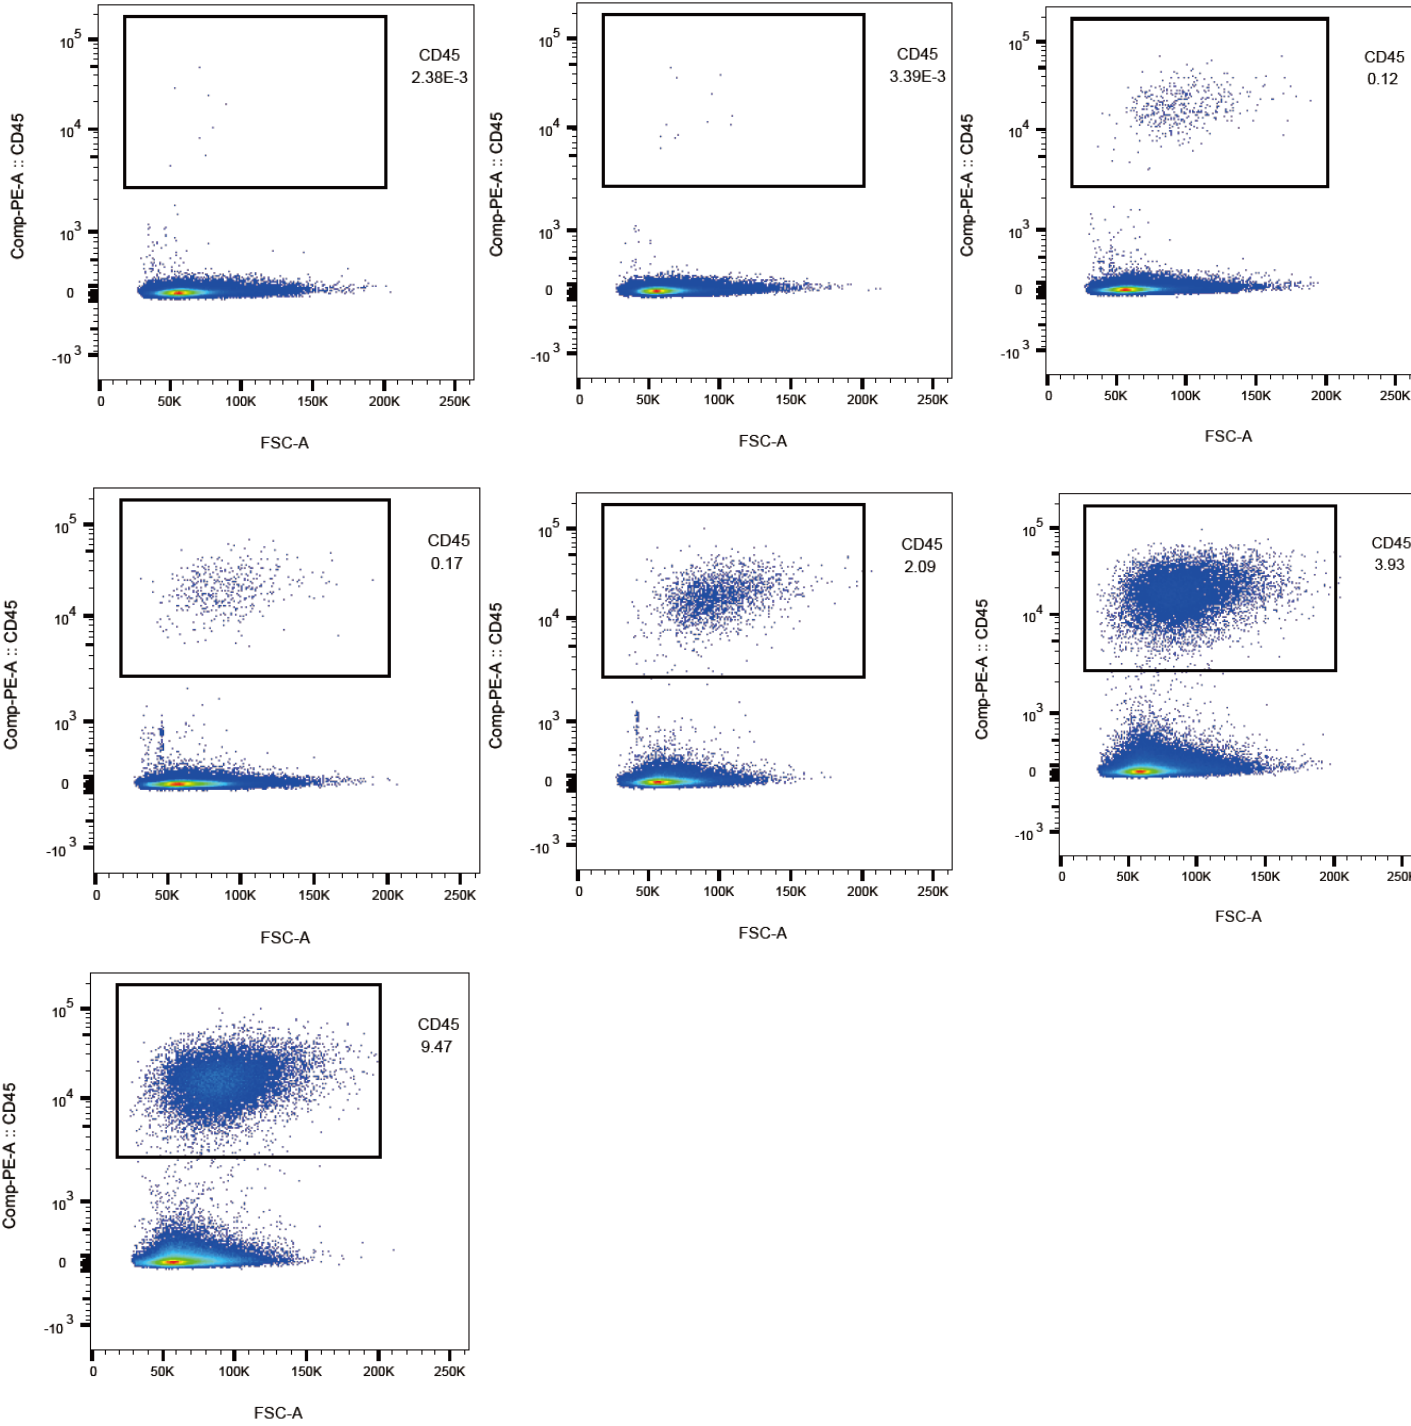



Supplementary Figure S4

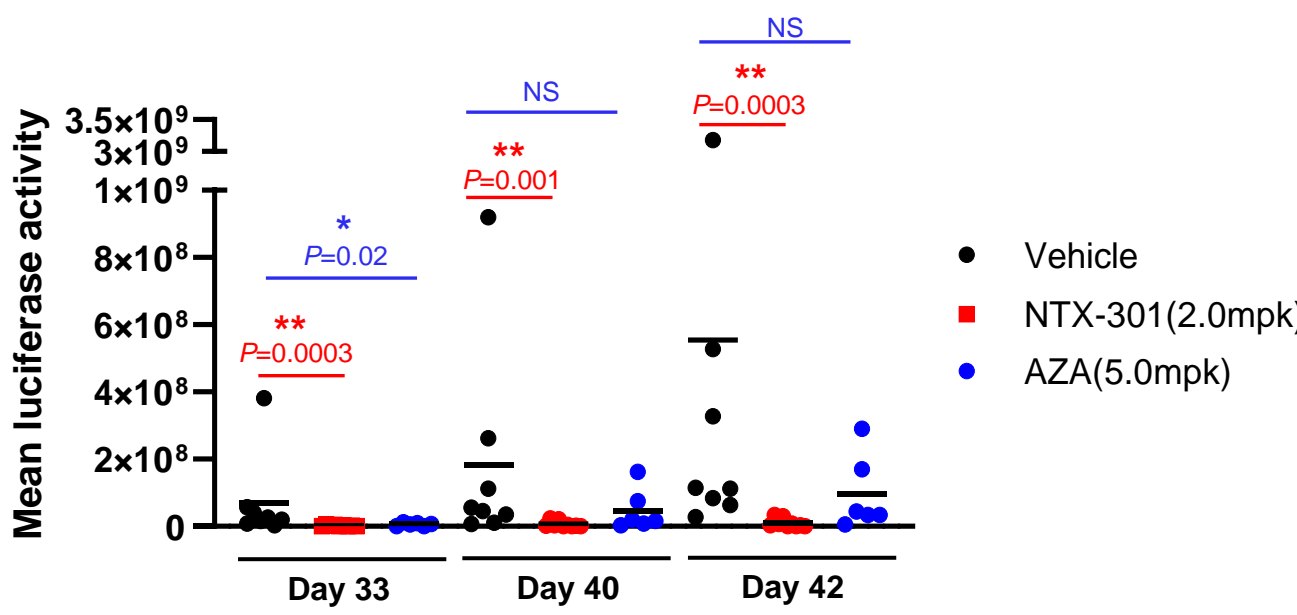

# Supplementary Figure S5

**A**

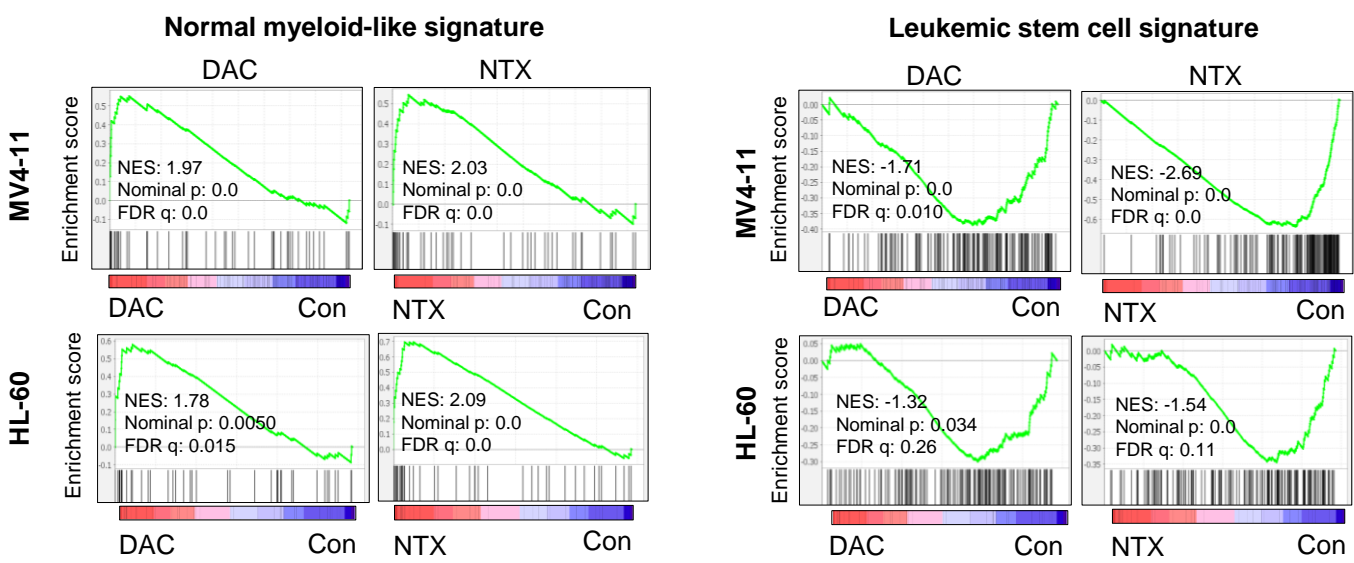

**B**

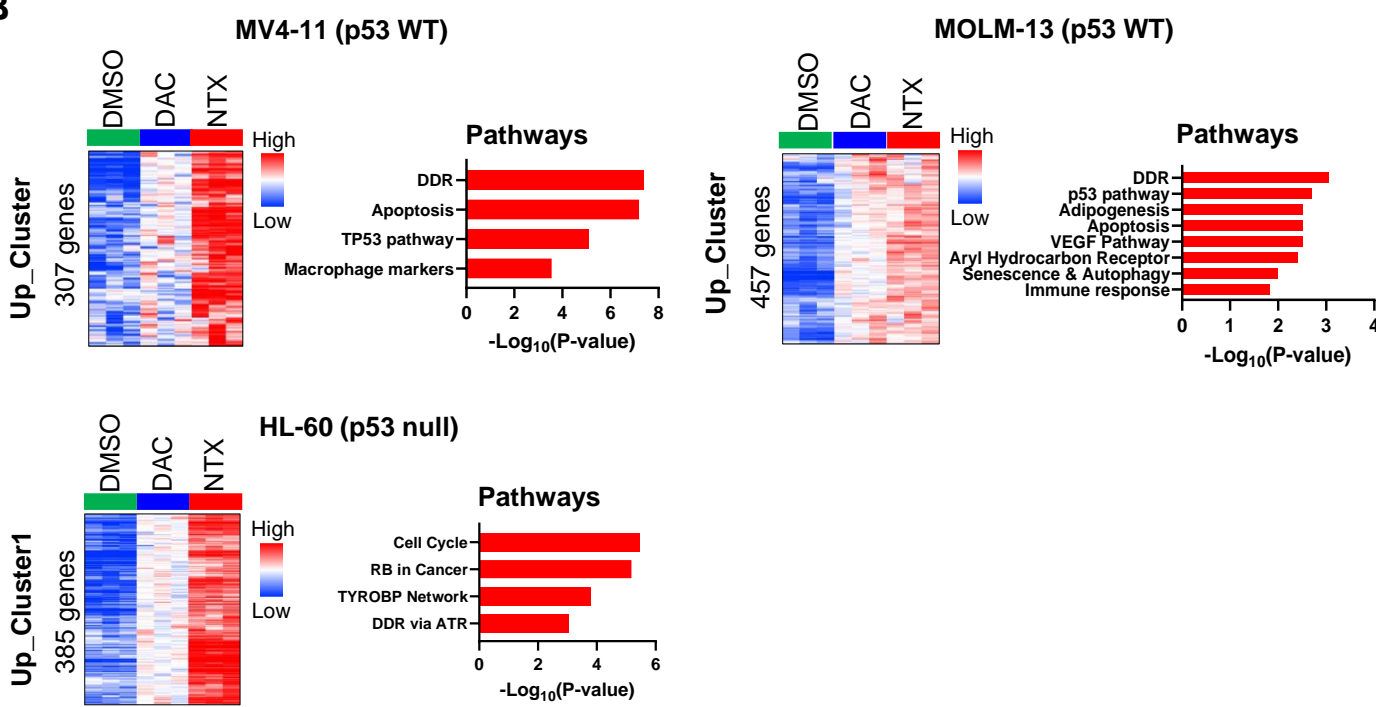

**Supplementary Figure S6**

**A**

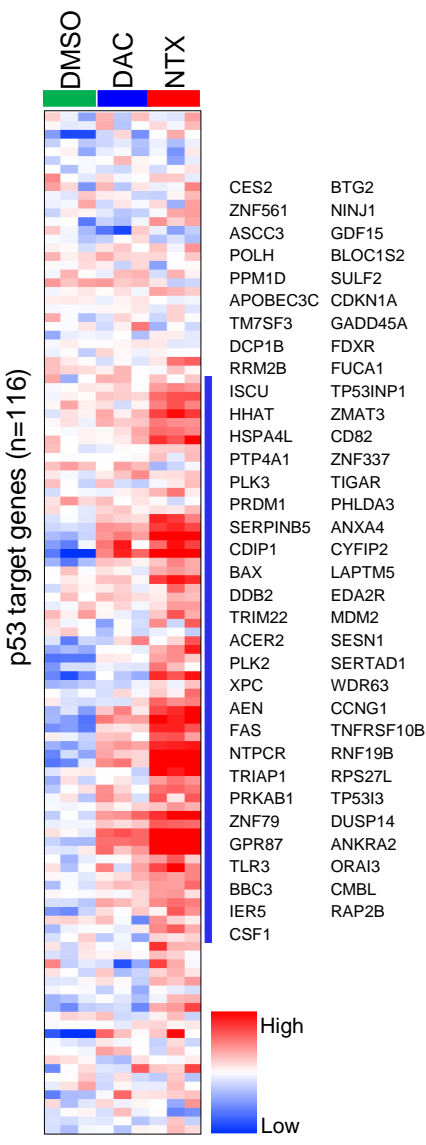

**B**

**Activation of p53 pathway**

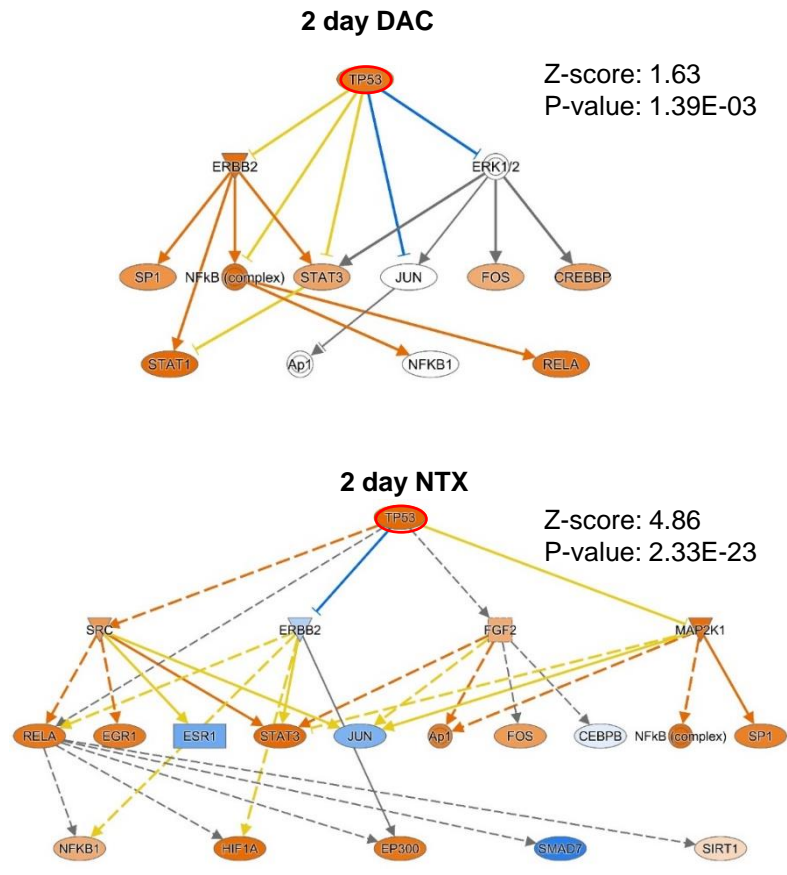

**C**

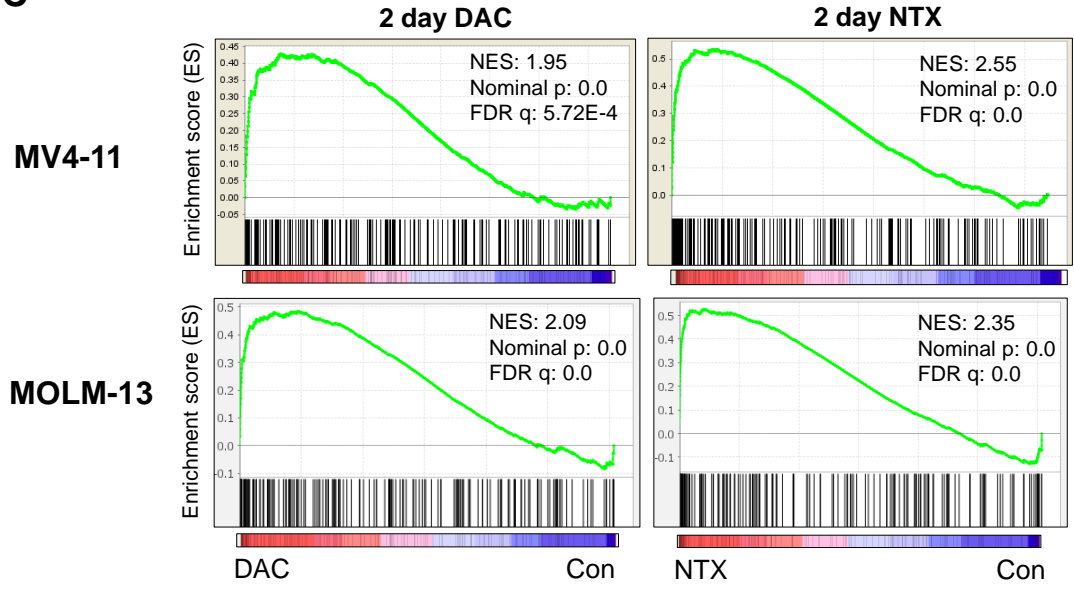

# Supplementary Figure S7

**A**

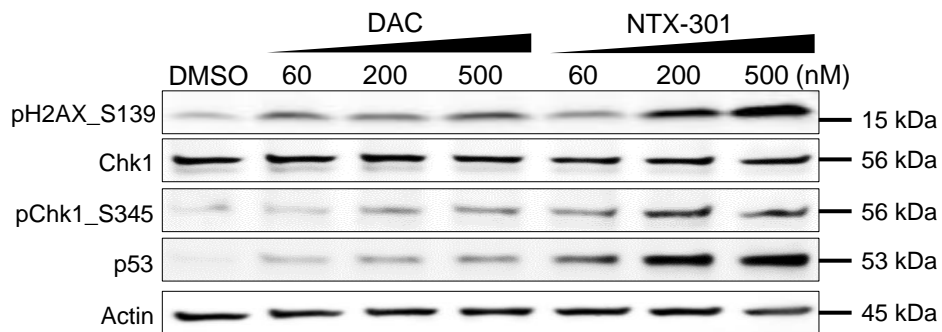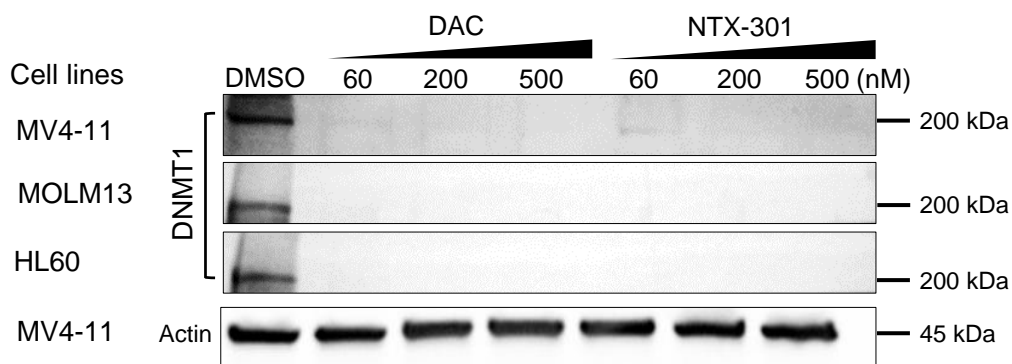

**B**

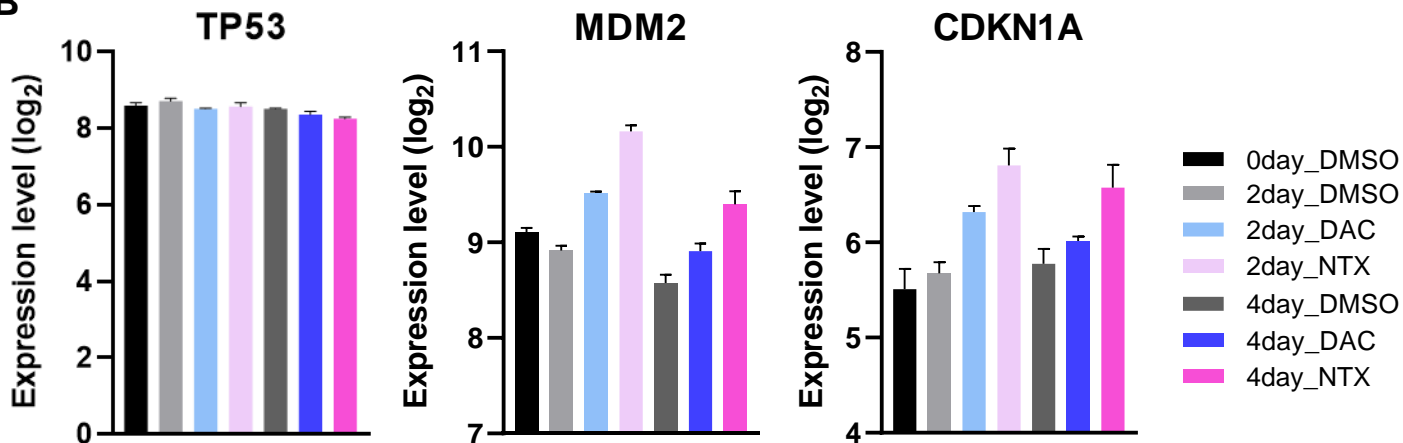

**C**

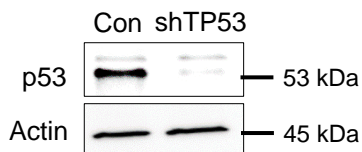

# Supplementary Figure S8

**A**

| Group | Mice | Drug        | Dose (mg/kg) | Route    | Regimen                                                      |
|-------|------|-------------|--------------|----------|--------------------------------------------------------------|
| 1     | 5    | Vehicle     | -            | po       | qd×5, 2 off, qd×5, 9 off for 3 cycles                        |
| 2     | 5    | NTX-301     | 2            | po       | qd×5, 2 off, qd×5, 9 off for 3 cycles                        |
| 3     | 5    | NTX+VCX     | 0.5 + 50     | po<br>po | qd×5, 2 off, qd×5, 9 off for 3 cycles<br>(qd×5, 2 off) ×3wks |
| 4     | 5    | NTX+VCX     | 1 + 50       | po<br>po | qd×5, 2 off, qd×5, 9 off for 3 cycles<br>(qd×5, 2 off) ×3wks |
| 5     | 5    | NTX+VCX     | 2 + 50       | po<br>po | qd×5, 2 off, qd×5, 9 off for 3 cycles<br>(qd×5, 2 off) ×3wks |
| 6     | 5    | AZA+VCX     | 2.5 + 50     | ip<br>po | biw×3wks<br>(qd×5, 2 off) ×3wks                              |
| 7     | 5    | Azacitidine | 5            | ip       | biw×3wks                                                     |
| 8     | 5    | Venetoclax  | 50           | po       | (qd×5, 2 off) ×3wks                                          |

**B**

| Group | Mice | Drug    | Dose (mg/kg) | Route    | Regimen                                                    |
|-------|------|---------|--------------|----------|------------------------------------------------------------|
| 1     | 8    | Vehicle | -            | po       | qd×5, 2 off, qd×5, 9 off for 3 cycles                      |
| 2     | 8    | NTX-301 | 2            | po       | qd×5, 2 off, qd×5, 9 off for 3 cycles                      |
| 3     | 8    | NTX+VCX | 0.5 + 100    | po<br>po | qd×5, 2 off, qd×5, 9 off for 3 cycles<br>(qd×5, 2 off) × 9 |
| 4     | 8    | NTX+VCX | 1 + 100      | po<br>po | qd×5, 2 off, qd×5, 9 off for 3 cycles<br>(qd×5, 2 off) × 9 |
| 5     | 8    | AZA+VCX | 2.5 + 100    | ip<br>po | Biw × 9<br>(qd×5, 2 off) × 9                               |
| 6     | 8    | VCX     | 100          | po       | (qd×5, 2 off) × 9                                          |

Supplementary Figure S9

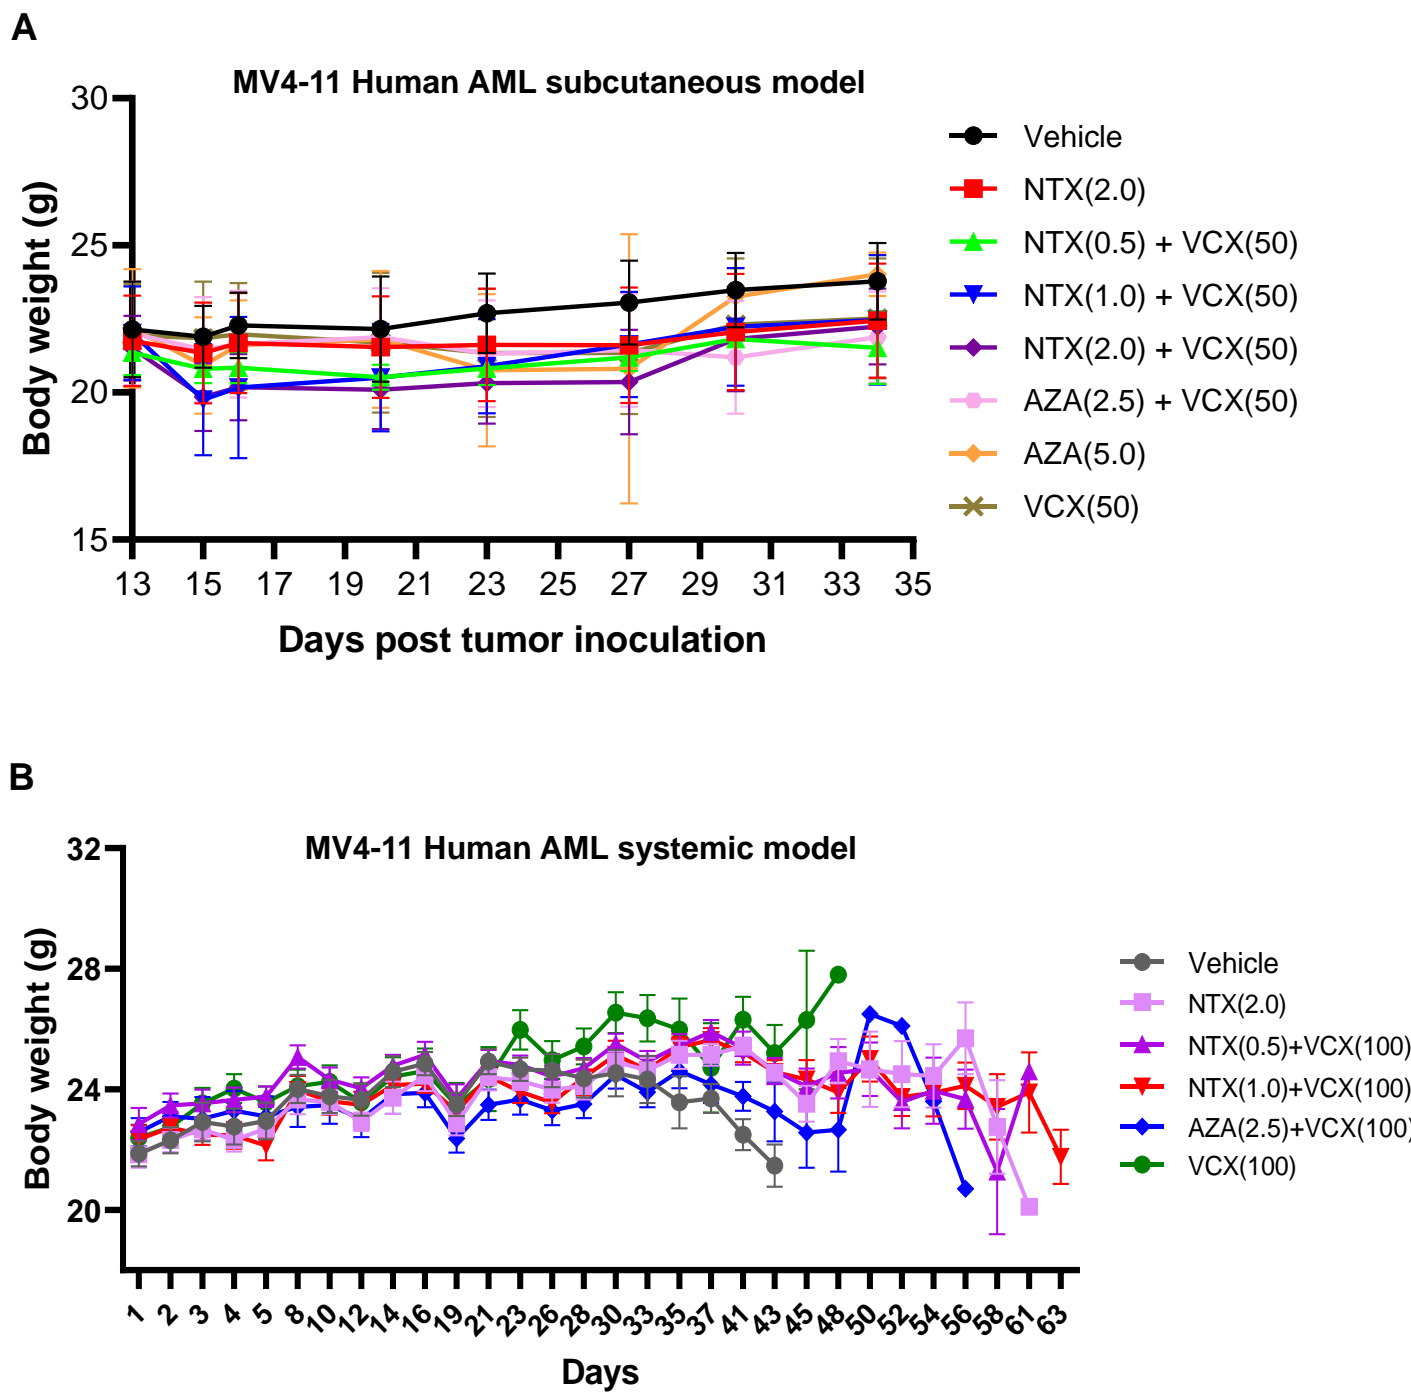

Supplement: 41408_2022_664_MOESM1_ESM.pdf [file 41408_2022_664_MOESM1_ESM.pdf]
